# Supplementary material for: Metalated-bipyridine-based porous hybrid polymers with POSS-derived Si–OH groups for synergistic catalytic CO2 fixation
Source: Royal Society of Chemistry journal article supplement (doi:10.1039/d0dt01667e), 2020-01-01
Supplement: d0dt01667e1.pdf [file d0dt01667e1.pdf]

## Electronic Supplementary Information

### **Metalated-bipyridine-based porous hybrid polymers with POSS-derived Si-OH groups for synergistic catalytic CO<sub>2</sub> fixation**

Yadong Zhang<sup>†</sup>, Niu Luo<sup>†</sup>, Jingyu Xu, Ke Liu, Shengqi Zhang, Qinglin Xu, Rui Huang, Zhouyang Long, Minman Tong and Guojian Chen\*

School of Chemistry and Materials Science, Jiangsu Key Laboratory of Green Synthetic Chemistry for Functional Materials, Jiangsu Normal University, Xuzhou 221116, China

\* Corresponding author: [gjchen@jsnu.edu.cn](mailto:gjchen@jsnu.edu.cn) (G. Chen)

<sup>†</sup> These authors contributed equally to this work

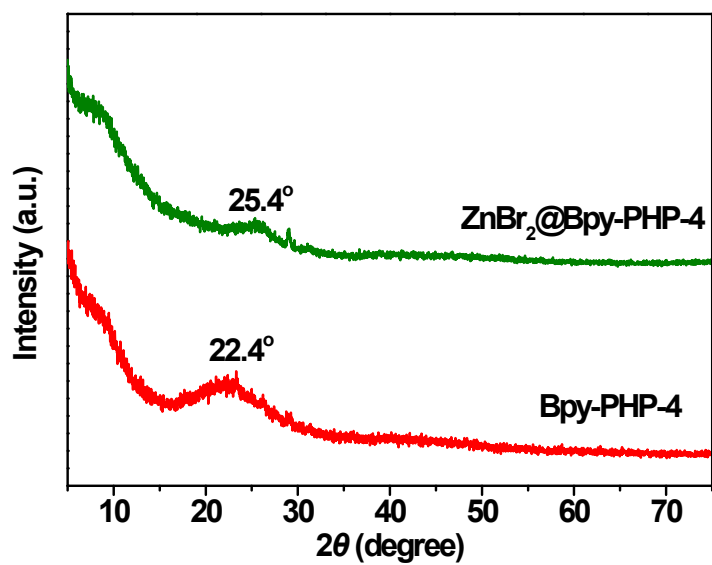

Fig. S1 XRD patterns of Bpy-PHP-4 and ZnBr<sub>2</sub>@Bpy-PHP-4.

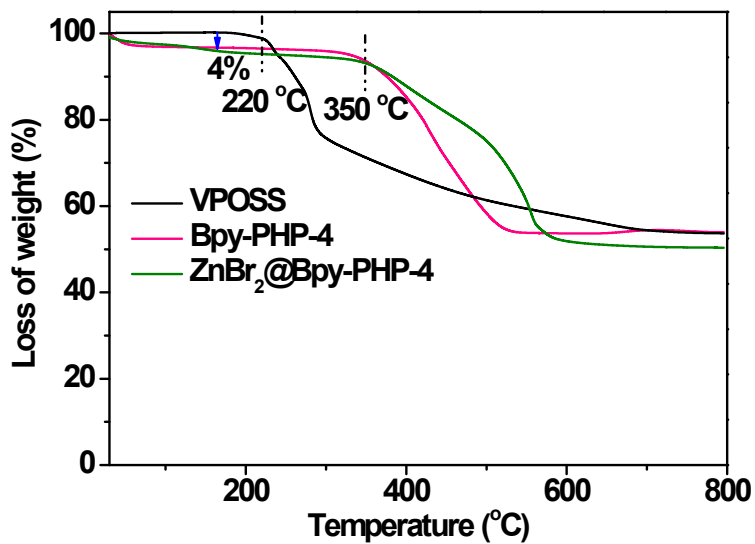

Fig. S2 Thermogravimetric analysis (TGA) curves of VPOSS, Bpy-PHP-4 and ZnBr<sub>2</sub>@Bpy-PHP-4 under air atmosphere.

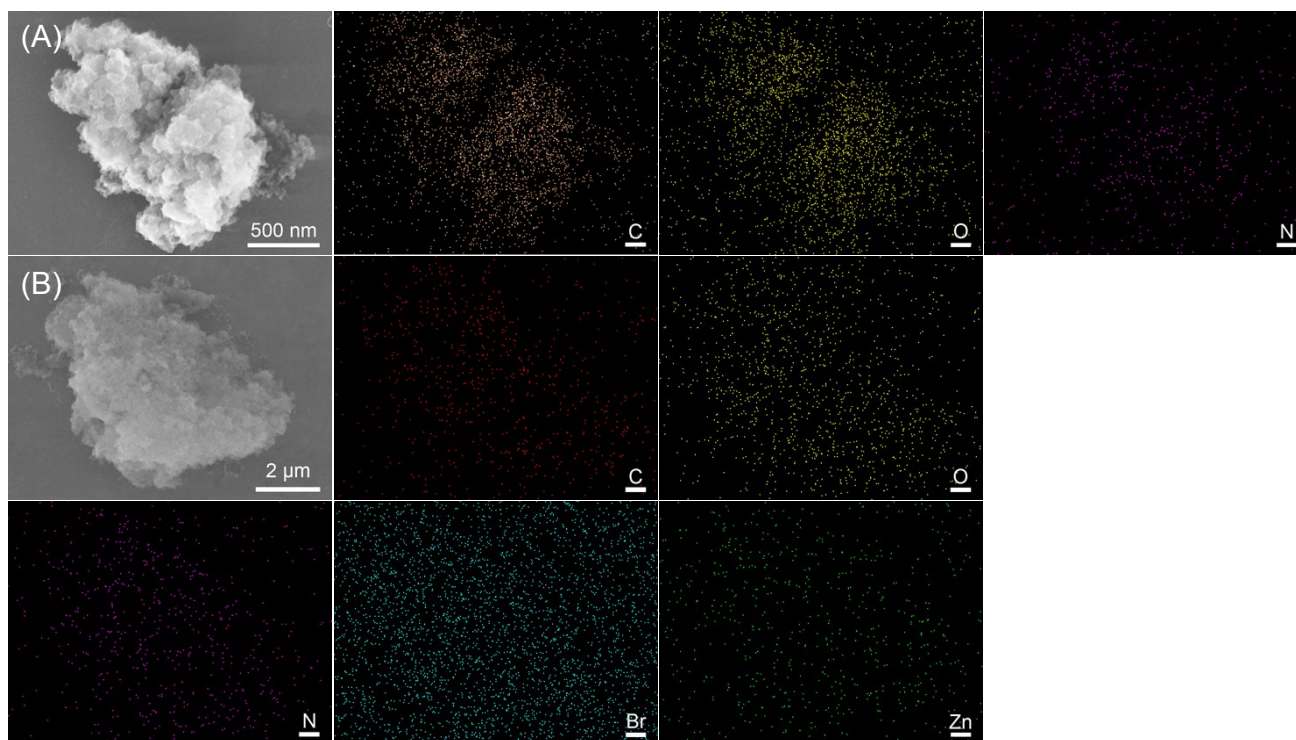

**Fig. S3** Energy-dispersive X-ray spectrometry (EDS) elemental mapping images of (A) Bpy-PHP-4 for C, O, N elements and (B) ZnBr<sub>2</sub>@Bpy-PHP-4 for C, O, N, Br, Zn elements at the SEM mode.

**Table S1** The detailed comparisons of the catalytic activity of ZnBr<sub>2</sub>@Bpy-PHP-4 with other metal-based POP and iPOP heterogeneous catalysts in the synthesis of cyclic carbonate from 1,2-epoxyhexane and CO<sub>2</sub>.<sup>a</sup>

| Entry     | Catalyst                                                | Co-catalyst <sup>b</sup> | <i>P</i> (MPa) | <i>T</i> (°C) | <i>t</i> (h) | Yield (%) | Ref.             |
|-----------|---------------------------------------------------------|--------------------------|----------------|---------------|--------------|-----------|------------------|
| 1         | Zn-CMP                                                  | TBAB                     | 3              | 120           | 1            | 96.1      | S1               |
| 2         | Cr-CMP                                                  | TBAB                     | 3              | 100           | 2            | 96.7      | S2               |
| 3         | Bp-Zn@MA                                                | TBAB                     | 1.5            | 100           | 1            | 99        | S3               |
| 4         | Cu/POP-Bpy                                              | TBAB                     | 0.1            | 50            | 48           | 99        | S4               |
| 5         | Co/POP-TPP                                              | TBAB                     | 0.1            | 29            | 24           | 88        | S5               |
| 6         | Py-Zn@MA                                                | none                     | 2              | 130           | 12           | 96        | S6               |
| 7         | PPh <sub>3</sub> -ILBr-ZnBr <sub>2</sub> @POPs          | none                     | 3              | 120           | 1            | 16        | S7               |
| 8         | Zn-CIF2-C <sub>2</sub> H <sub>4</sub>                   | none                     | 2.5            | 120           | 4            | 99        | S8               |
| 9         | SBA-Zn-TPy <sup>+</sup> PBr <sup>-</sup> <sub>DMF</sub> | none                     | 1.5            | 120           | 4.5          | 99        | S9               |
| 10        | ZnTPy-BIM4/CNTs-3                                       | none                     | 1.5            | 120           | 4            | 95        | S10              |
| 11        | SYSU-Zn@IL2                                             | none                     | 1              | 80            | 24           | 78        | S11              |
| 12        | POF-Zn <sup>2+</sup> -I <sup>-</sup>                    | none                     | 1              | 60            | 8            | 82.7      | S12              |
| 13        | Al-CPOP                                                 | none                     | 0.1            | 120           | 24           | 15        | S13              |
| <b>14</b> | <b>ZnBr<sub>2</sub>@Bpy-PHP-4</b>                       | none                     | <b>0.1</b>     | <b>80</b>     | <b>72</b>    | <b>99</b> | <b>This work</b> |

<sup>a</sup> It should be pointed out that different catalysts were evaluated under different conditions (reaction temperature, CO<sub>2</sub> pressure, the amount of substrate/catalyst, solvent, etc.), thus it is difficult to directly compare the activity between different catalytic systems. The represented catalytic activities using yields of the product in Table S1 were obtained under their own optimized conditions, which should be considered in a reasonable comparison; <sup>b</sup> The co-catalyst is tetra-n-butyl-ammonium bromide (TBAB).

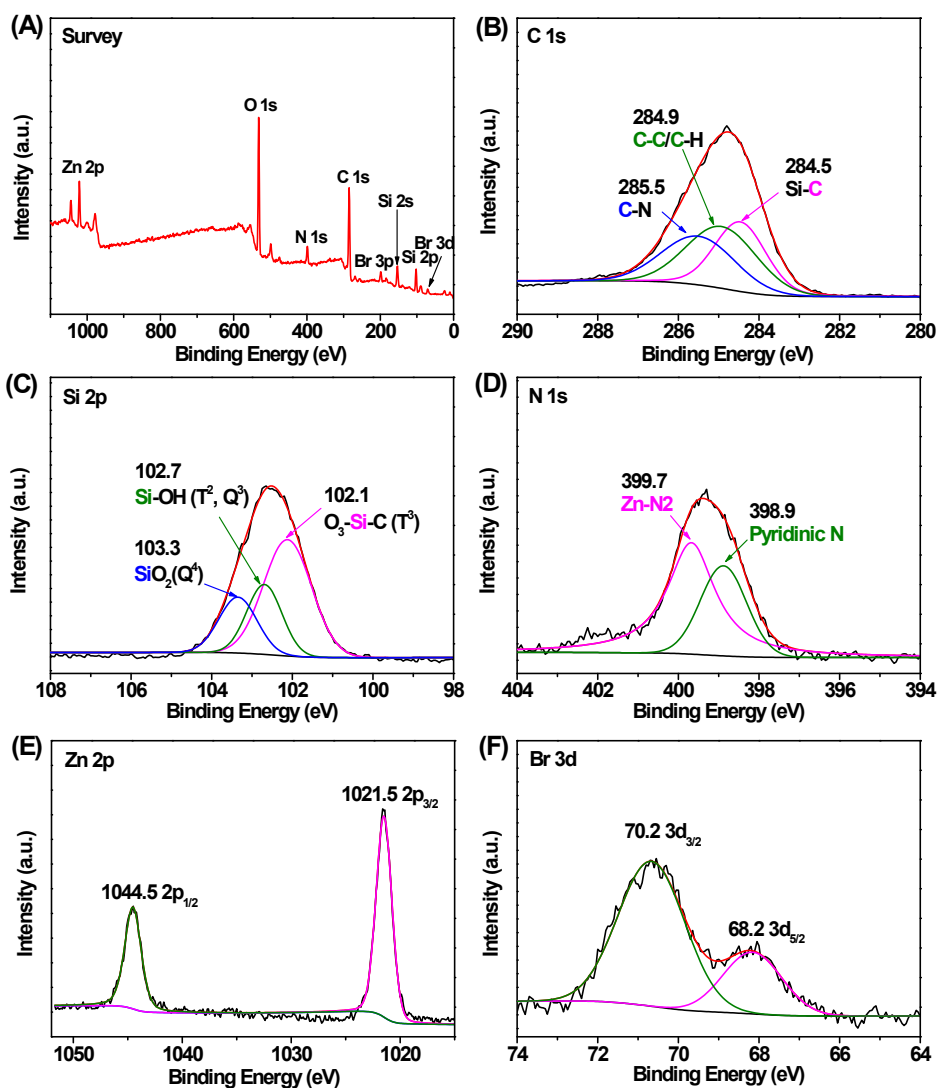

**Fig. S4** (A) XPS spectrum survey, (B) C 1s , (C) Si 2p , (D) N 1s, (E) Zn 2p and (F) Br 3d for the reused catalyst ZnBr<sub>2</sub>@Bpy-PHP-4R.

**Table S2** The elemental compositions of the fresh catalyst ZnBr<sub>2</sub>@Bpy-PHP-4 and reused ZnBr<sub>2</sub>@Bpy-PHP-4R detected from XPS. <sup>a</sup>

| Sample                                   | C (at%) | Si (at%) | O (at%) | N (at%) | Br (at%) | Zn (at%) |
|------------------------------------------|---------|----------|---------|---------|----------|----------|
| The fresh ZnBr <sub>2</sub> @Bpy-PHP-4   | 49.93   | 12.57    | 24.64   | 6.80    | 5.26     | 2.68     |
| The reused ZnBr <sub>2</sub> @Bpy-PHP-4R | 50.28   | 11.72    | 28.14   | 6.25    | 4.65     | 2.40     |

<sup>a</sup> All elemental compositions were presented by the atomic concentration (at%).

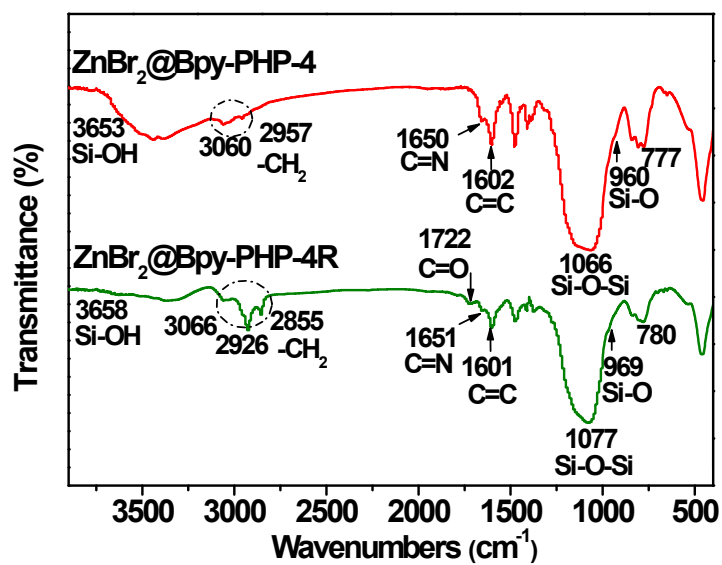

Fig. S5 FTIR spectra of the fresh catalyst  $\text{ZnBr}_2@\text{Bpy-PHP-4}$  and the reused catalyst  $\text{ZnBr}_2@\text{Bpy-PHP-4R}$ .

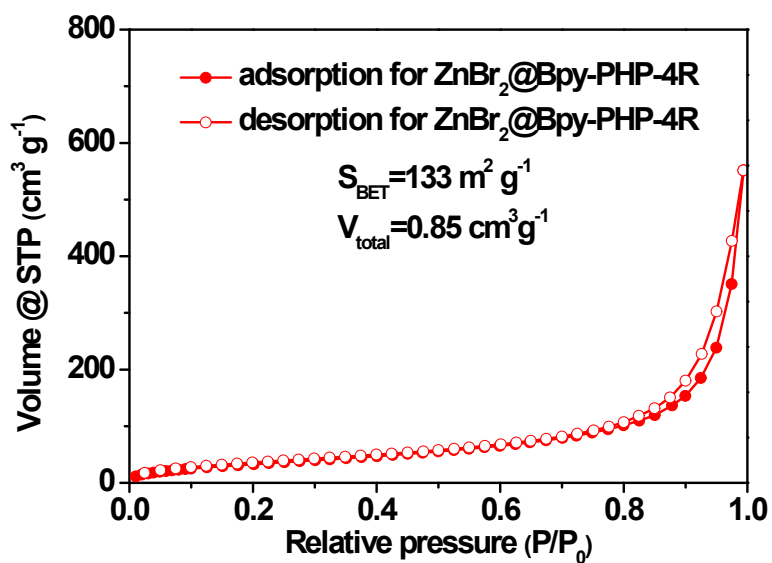

Fig. S6  $\text{N}_2$ -sorption isotherms of the reused catalyst  $\text{ZnBr}_2@\text{Bpy-PHP-4R}$ .

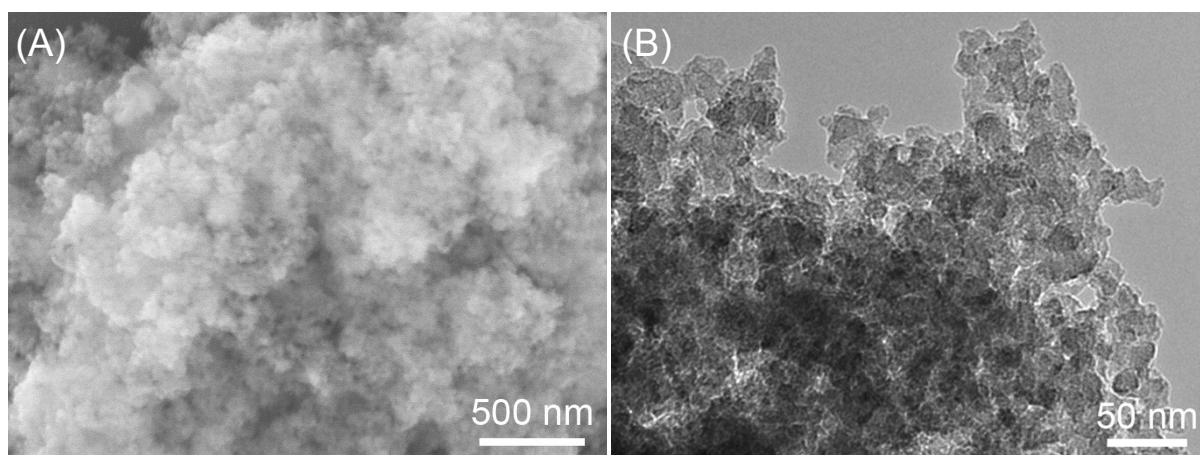

**Fig. S7** (A) SEM and (B) TEM images of the reused catalyst  $\text{ZnBr}_2@\text{Bpy-PHP-4R}$ .

### **Characterizations for the reused catalyst $\text{ZnBr}_2@\text{Bpy-PHP-4R}$**

XPS and FTIR were used to characterize chemical structure and elemental composition of the reused catalyst  $\text{ZnBr}_2@\text{Bpy-PHP-4R}$ , as shown in Fig. S4, Fig. S5 and Table S2. Compared with the fresh catalyst  $\text{ZnBr}_2@\text{Bpy-PHP-4}$ , the XPS spectra and elemental compositions for Si, C, N, Zn and Br in the reused  $\text{ZnBr}_2@\text{Bpy-PHP-4R}$  have no obvious changes, indicating its well preserved chemical structural composition. The characteristic peaks of reused  $\text{ZnBr}_2@\text{Bpy-PHP-4R}$  in FTIR spectrum was almost identical to the fresh catalyst (Fig. S5). However, one new absorption peak was observed at  $1722\text{ cm}^{-1}$  and enhanced peaks centered at  $2926\text{ cm}^{-1}$ , attributed to the C=O stretching band and  $-\text{CH}_2-$  of the cyclic carbonate that slightly adsorbed in the pore of the catalyst. Additionally,  $\text{ZnBr}_2@\text{Bpy-PHP-4R}$  was characterized by  $\text{N}_2$ -sorption experiment (Fig. S6) plus SEM and TEM (Fig. S7). The  $S_{\text{BET}}$  and  $V_{\text{total}}$  values of  $\text{ZnBr}_2@\text{Bpy-PHP-4R}$  slightly decrease compared with the fresh one, due to the adsorbed product within the pore of the catalyst. As described in the SEM and TEM images, the porous structure and morphology of  $\text{ZnBr}_2@\text{Bpy-PHP-4R}$  was well retained.

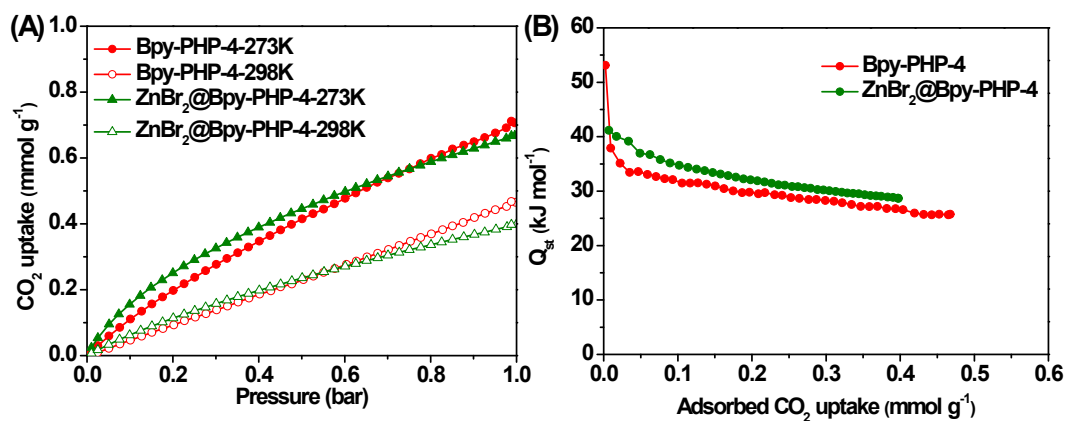

**Fig. S8** (A) CO<sub>2</sub> adsorption isotherms of Bpy-PHP-4 and ZnBr<sub>2</sub>@Bpy-PHP-4 collected up to 1.0 bar at 273 K and 298 K. (B) The isosteric heat ( $Q_{st}$ ) plots of CO<sub>2</sub> adsorption for Bpy-PHP-4 and ZnBr<sub>2</sub>@Bpy-PHP-4 calculated using the Clausius-Clapeyron equation.



Supplementary  $^1\text{H}$  NMR data and spectra for the produced cyclic carbonates

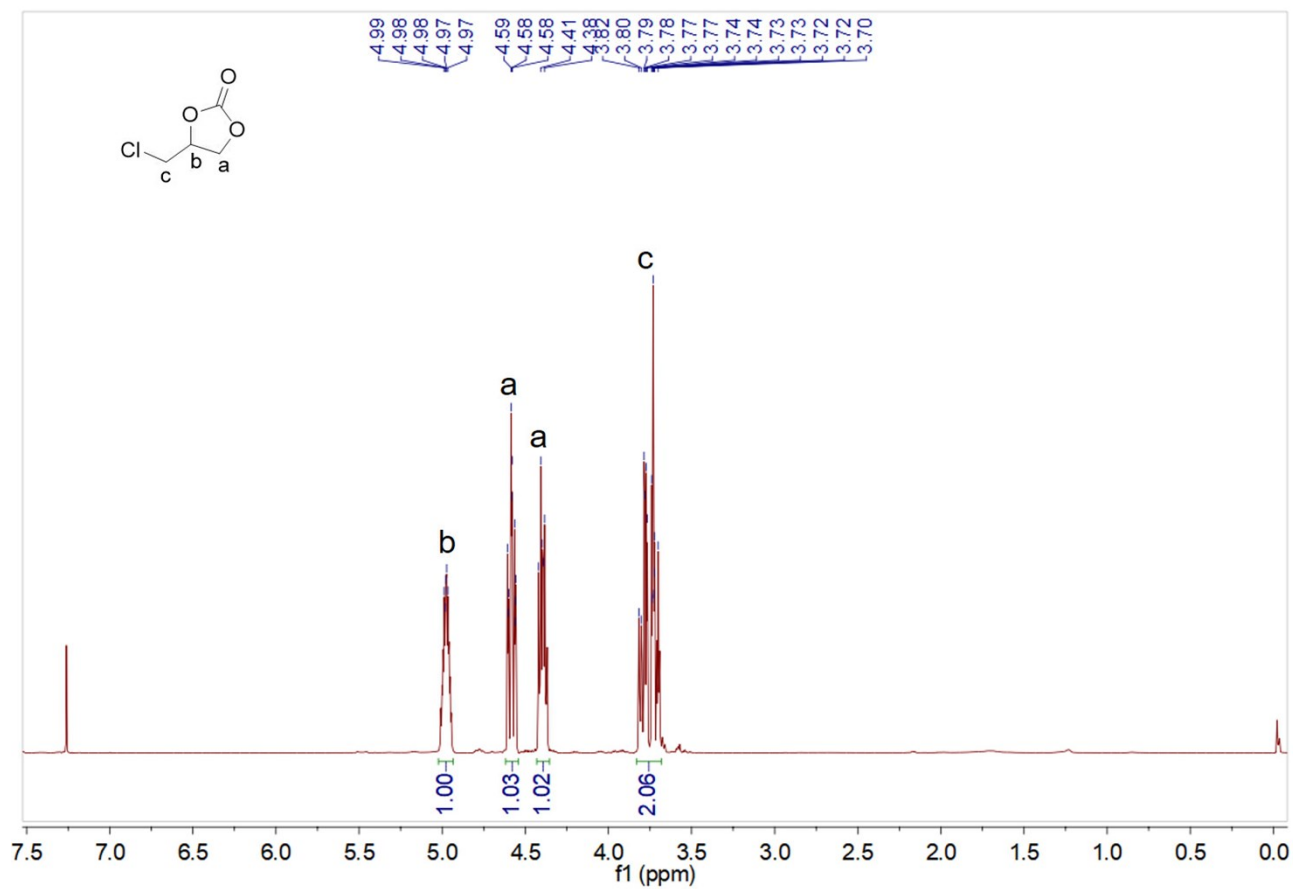

**Fig. S9**  $^1\text{H}$  NMR spectrum of 4-(chloromethyl)-1,3-dioxolan-2-one (400 MHz,  $\text{CDCl}_3$ ):  $\delta$  5.02~4.93 (1H, CH), 4.62~4.54 (1H,  $\text{CH}_2$ ), 4.43~4.35 (1H,  $\text{CH}_2$ ), and 3.83~3.68 ppm (2H,  $\text{CH}_2$ ).

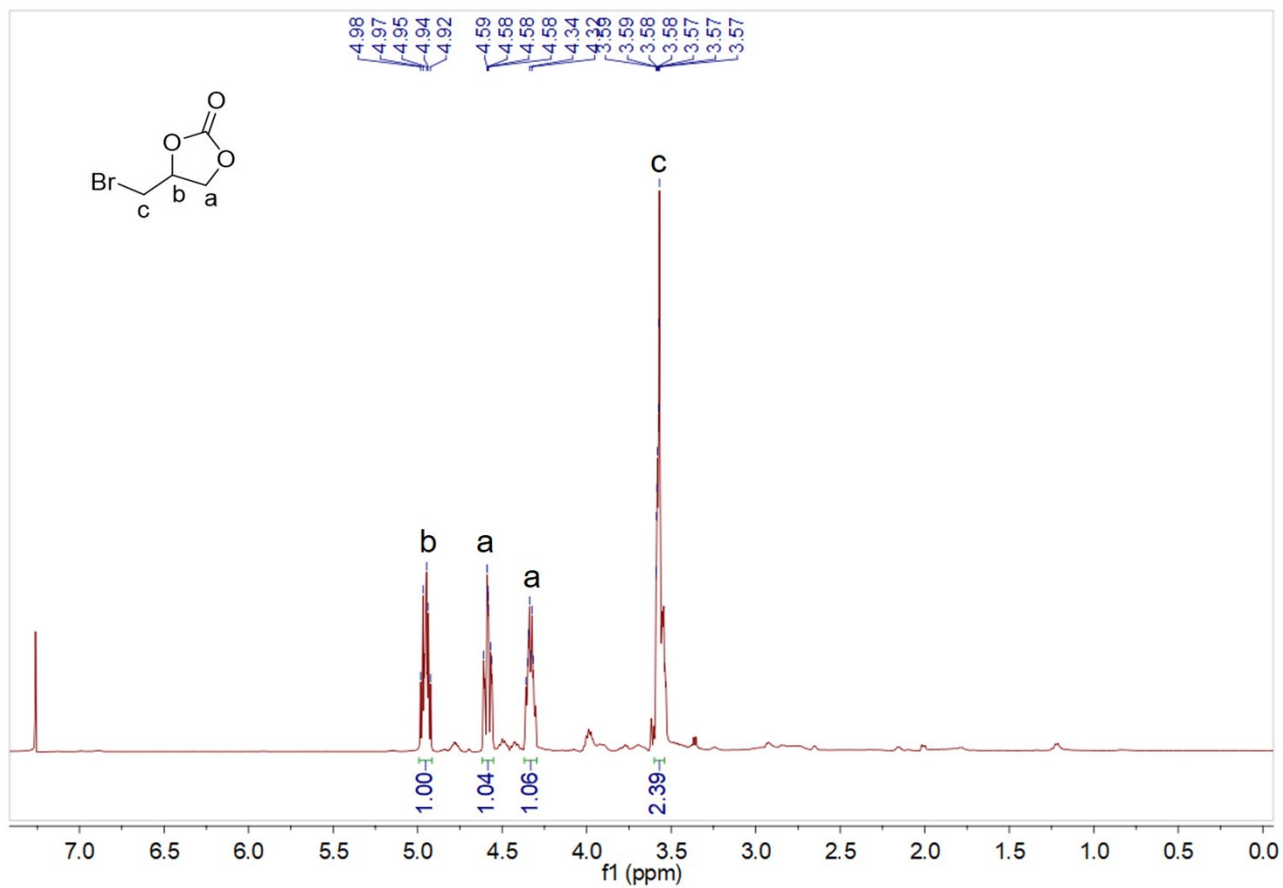

**Fig. S10** <sup>1</sup>H NMR spectrum of 4-(bromomethyl)-1,3-dioxolan-2-one (400 MHz, CDCl<sub>3</sub>): δ 4.99~4.91 (1H, CH), 4.62~4.55 (1H, CH<sub>2</sub>), 4.37~4.30 (1H, CH<sub>2</sub>), and 3.60~3.54 ppm (2H, CH<sub>2</sub>).

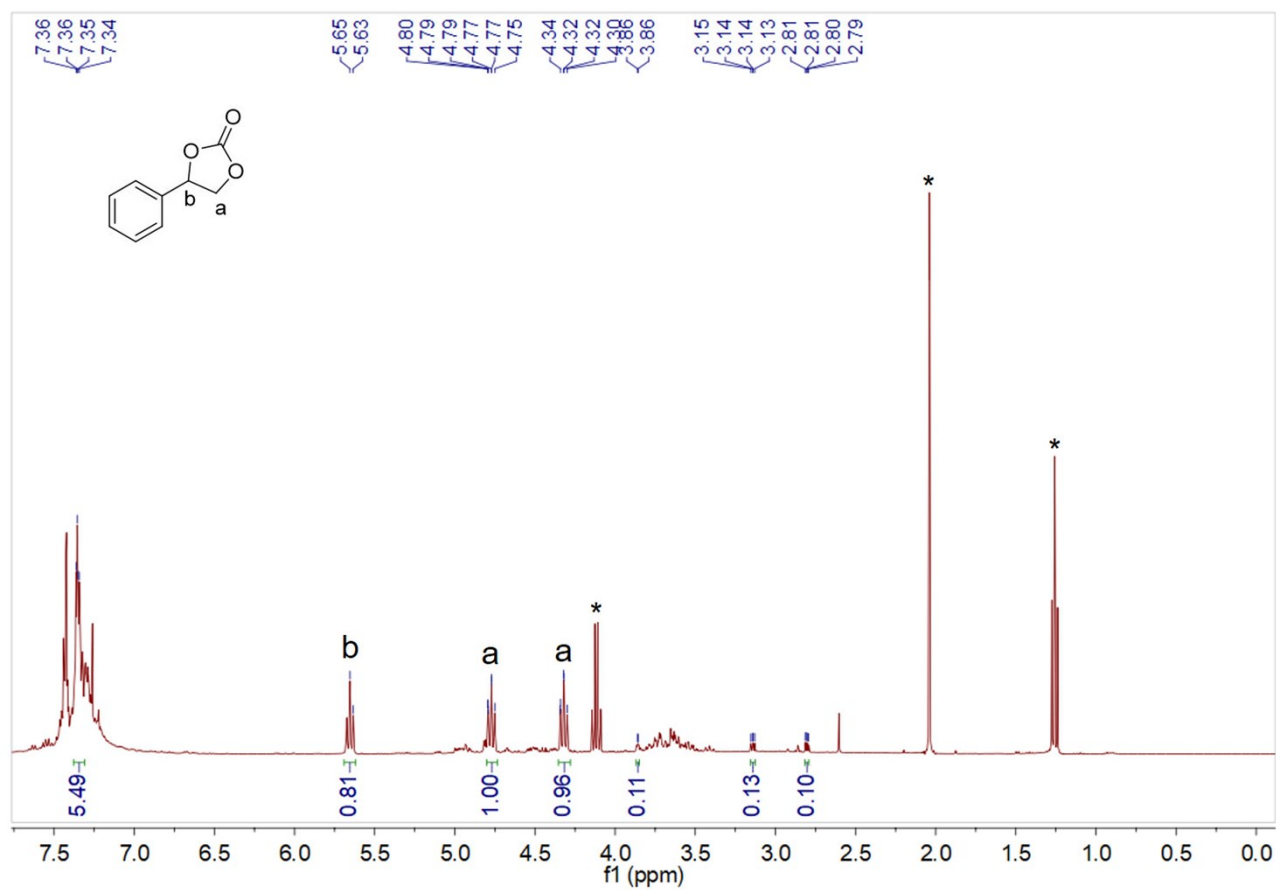

**Fig. S11**  $^1\text{H}$  NMR spectrum of 4-phenyl-1,3-dioxolan-2-one (400 MHz,  $\text{CDCl}_3$ ):  $\delta$  7.35 (5H, CH), 5.64 (1H,  $\text{CH}_2$ ), 4.80~4.74 (1H,  $\text{CH}_2$ ), and 4.35~4.28 ppm (1H,  $\text{CH}_2$ ).

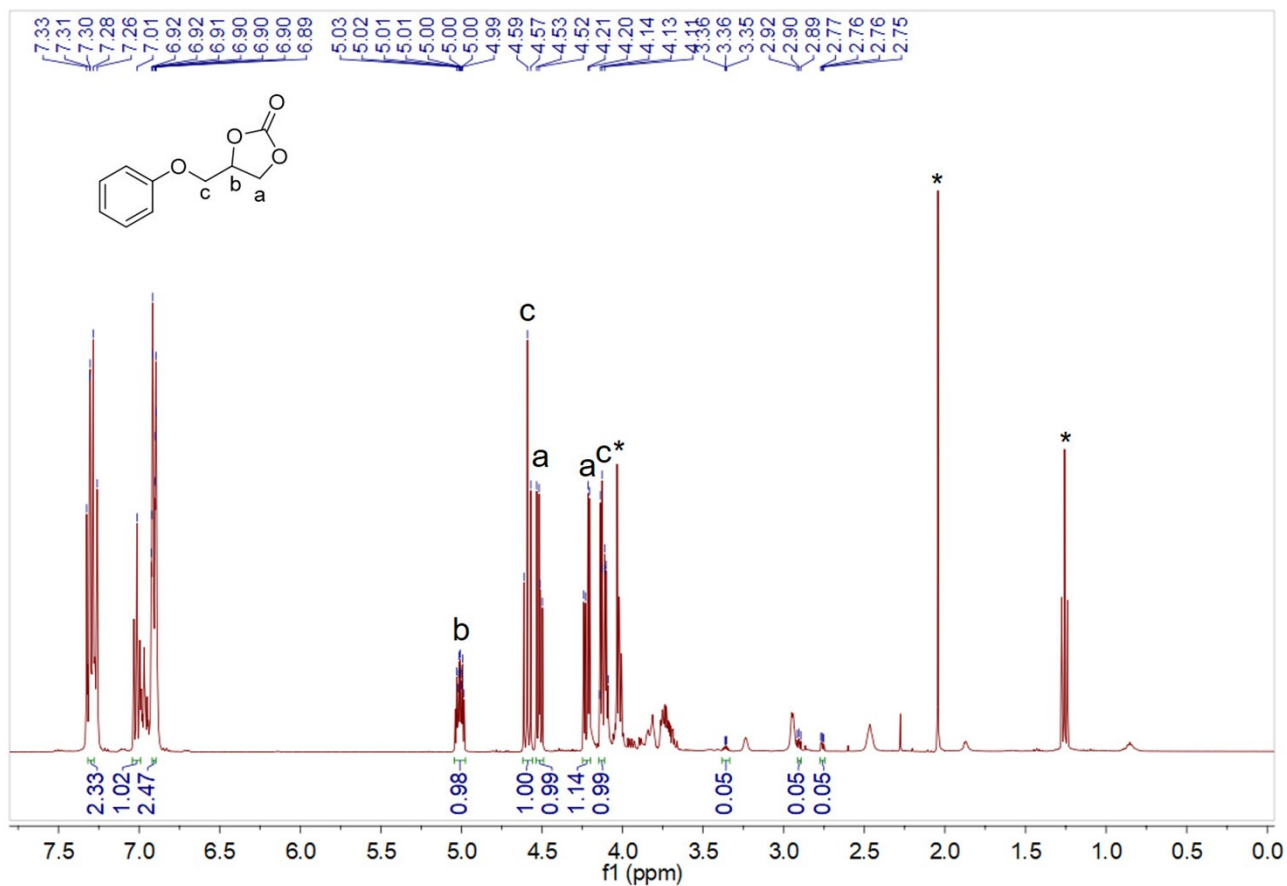

**Fig. S12** <sup>1</sup>H NMR spectrum of 4-(phenoxy)methyl-1,3-dioxolan-2-one (400 MHz, CDCl<sub>3</sub>): δ 7.32~7.28 (2H, CH), 7.01 (1H, CH), 6.92~6.89 (2H, CH), 5.04~4.97 (1H, CH), 4.59 (1H, CH<sub>2</sub>), 4.52 (1H, CH<sub>2</sub>), 4.22 (1H, CH<sub>2</sub>), and 4.13 ppm (1H, CH<sub>2</sub>).

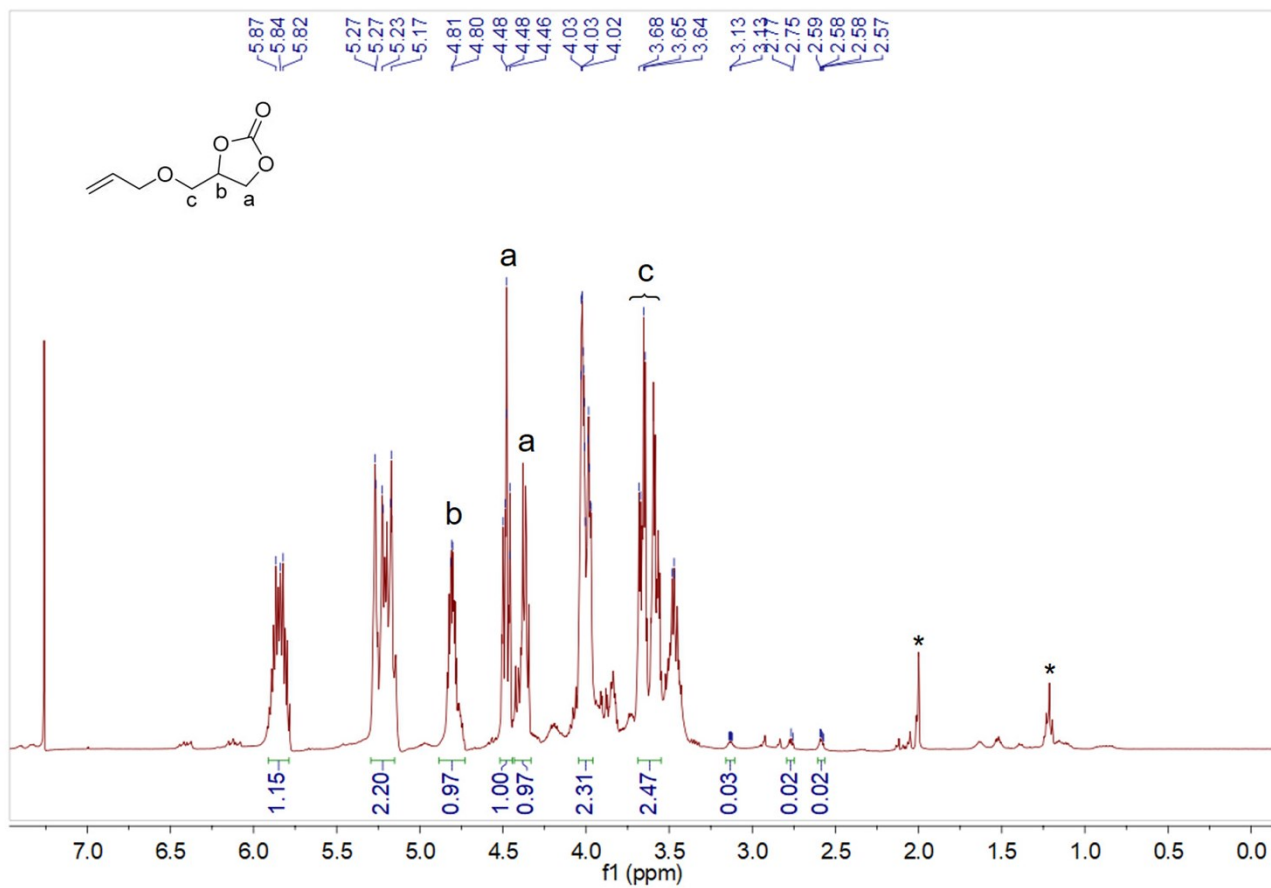

**Fig. S13**  $^1\text{H}$  NMR spectrum of allyloxymethyl-1,3-dioxolan-2-one (400 MHz,  $\text{CDCl}_3$ ):  $\delta$  5.91~5.79 (1H, CH), 5.29~5.15 (2H,  $\text{CH}_2$ ), 4.88~4.73 (1H, CH), 4.52~4.44 (1H,  $\text{CH}_2$ ), 4.38 (1H,  $\text{CH}_2$ ), 4.04~3.96 (2H,  $\text{CH}_2$ ), and 3.66 ppm (2H,  $\text{CH}_2$ ).

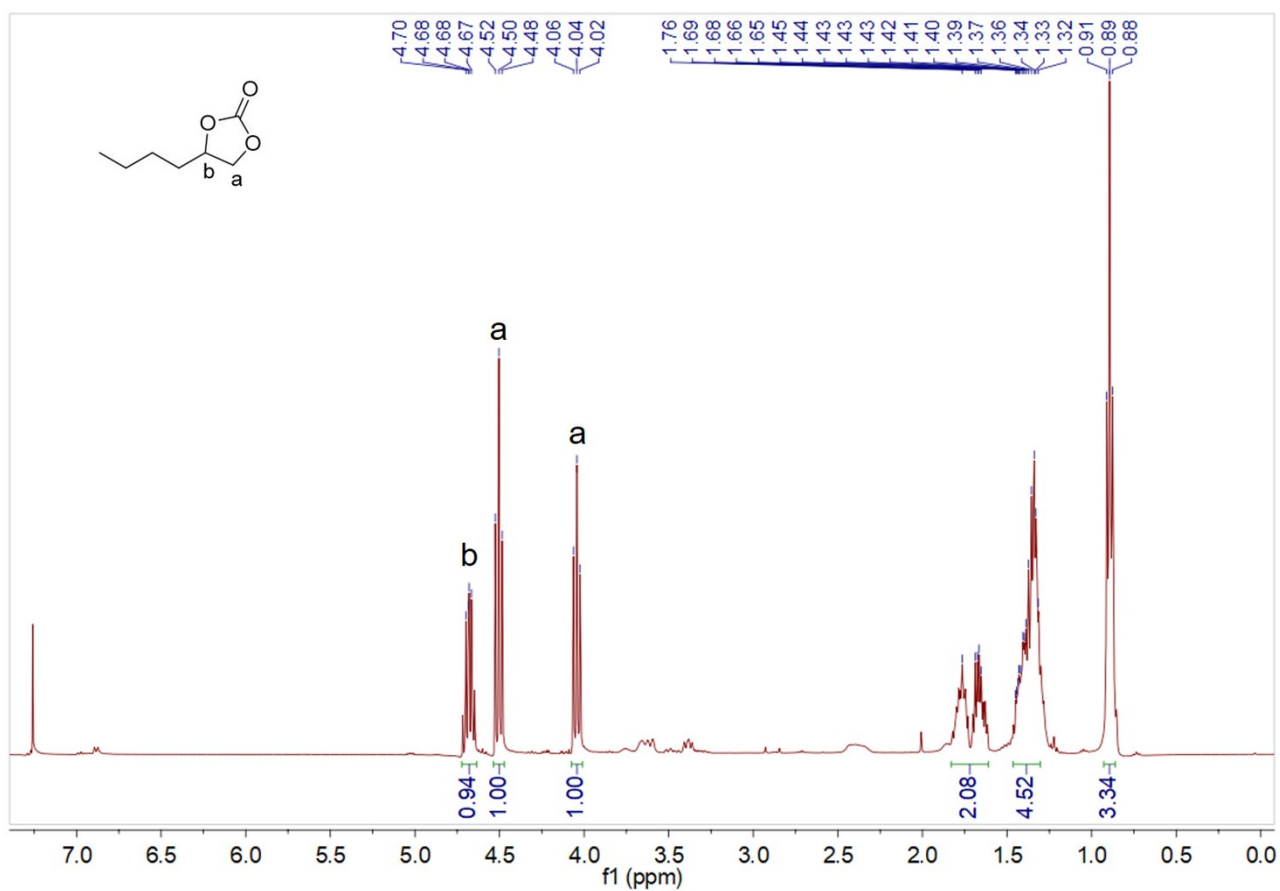

**Fig. S14**  $^1\text{H}$  NMR spectrum of 4-butyl-1,3-dioxolan-2-one (400 MHz,  $\text{CDCl}_3$ ):  $\delta$  4.68 (1H,  $\text{CH}_2$ ), 4.50 (1H,  $\text{CH}_2$ ), 4.04 (1H,  $\text{CH}_2$ ), 1.83~1.61 (2H,  $\text{CH}_2$ ), 1.47~1.30 (4H,  $\text{CH}_2$ ), and 0.89 ppm (3H,  $\text{CH}_3$ ).

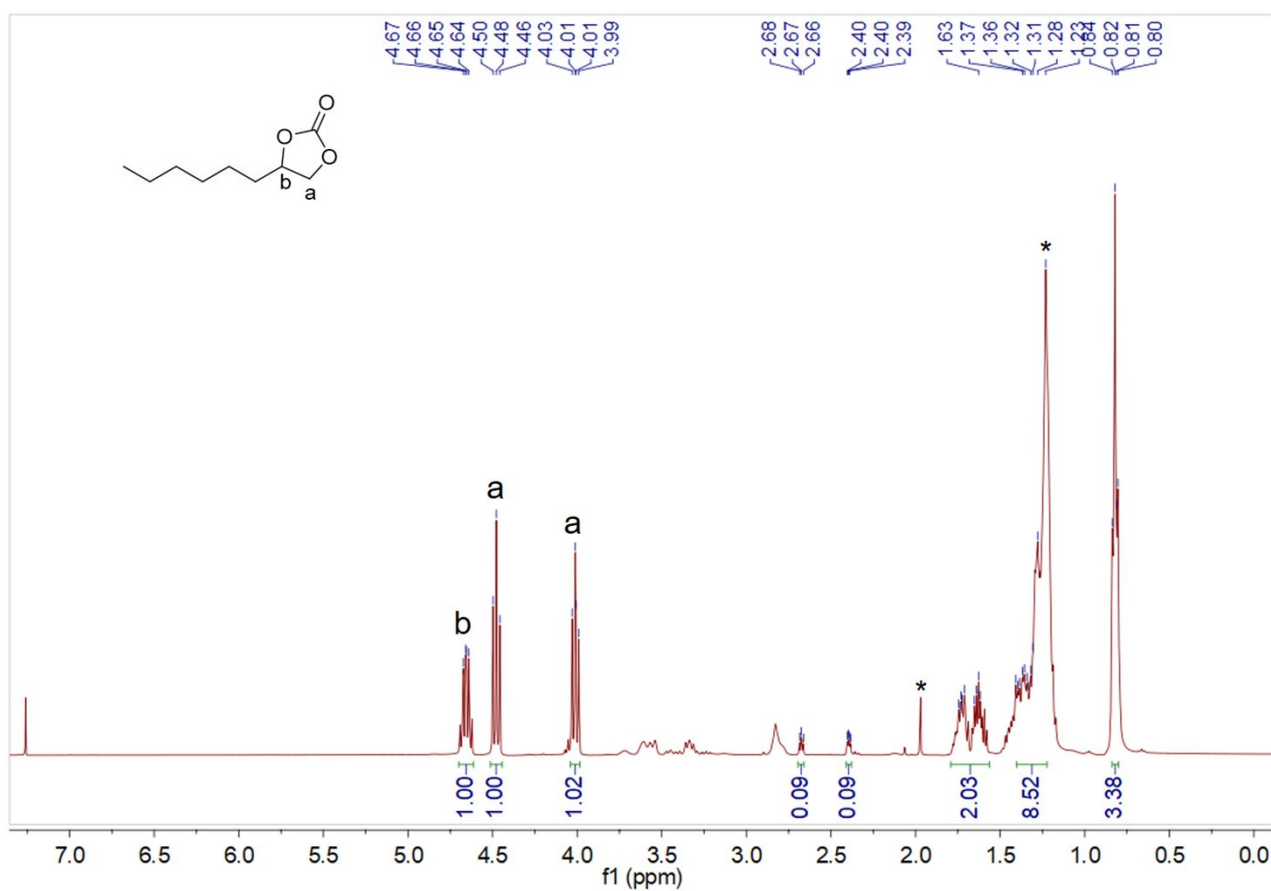

**Fig. S15**  $^1\text{H}$  NMR spectrum of 4-hexyl-1,3-dioxolan-2-one (400 MHz,  $\text{CDCl}_3$ ):  $\delta$  4.66 (1H,  $\text{CH}_2$ ), 4.48 (1H,  $\text{CH}_2$ ), 4.01 (1H,  $\text{CH}_2$ ), 1.79~1.56 (2H,  $\text{CH}_2$ ), 1.40~1.22 (8H,  $\text{CH}_2$ ), and 0.82 ppm (3H,  $\text{CH}_3$ ).

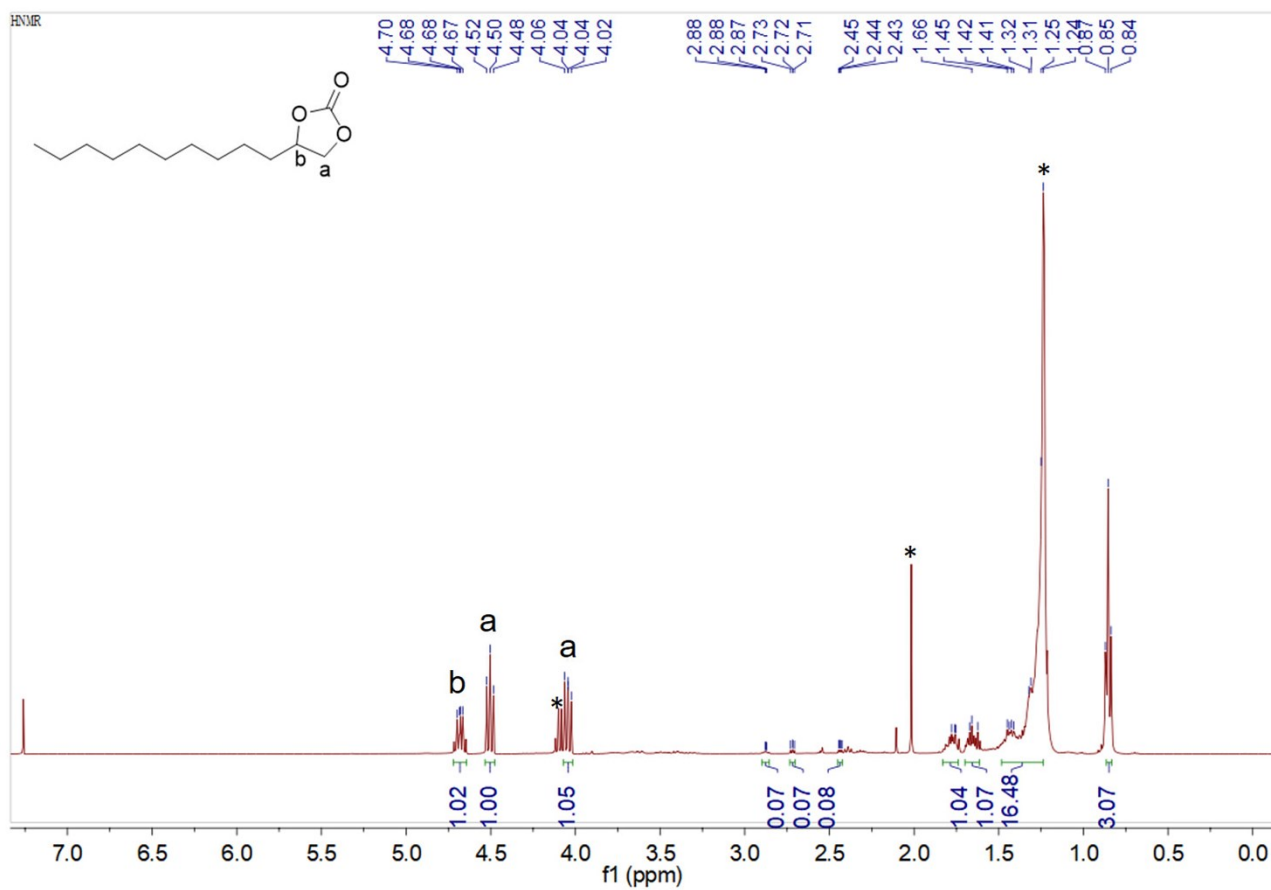

**Fig. S16**  $^1\text{H}$  NMR spectrum of 4-decyl-1,3-dioxolan-2-one (400 MHz,  $\text{CDCl}_3$ ):  $\delta$  4.68 (1H,  $\text{CH}_2$ ), 4.50 (1H,  $\text{CH}_2$ ), 4.04 (1H,  $\text{CH}_2$ ), 1.84~1.74 (2H,  $\text{CH}_2$ ), 1.23 (16H,  $\text{CH}_2$ ), and 0.85 ppm (3H,  $\text{CH}_3$ ).



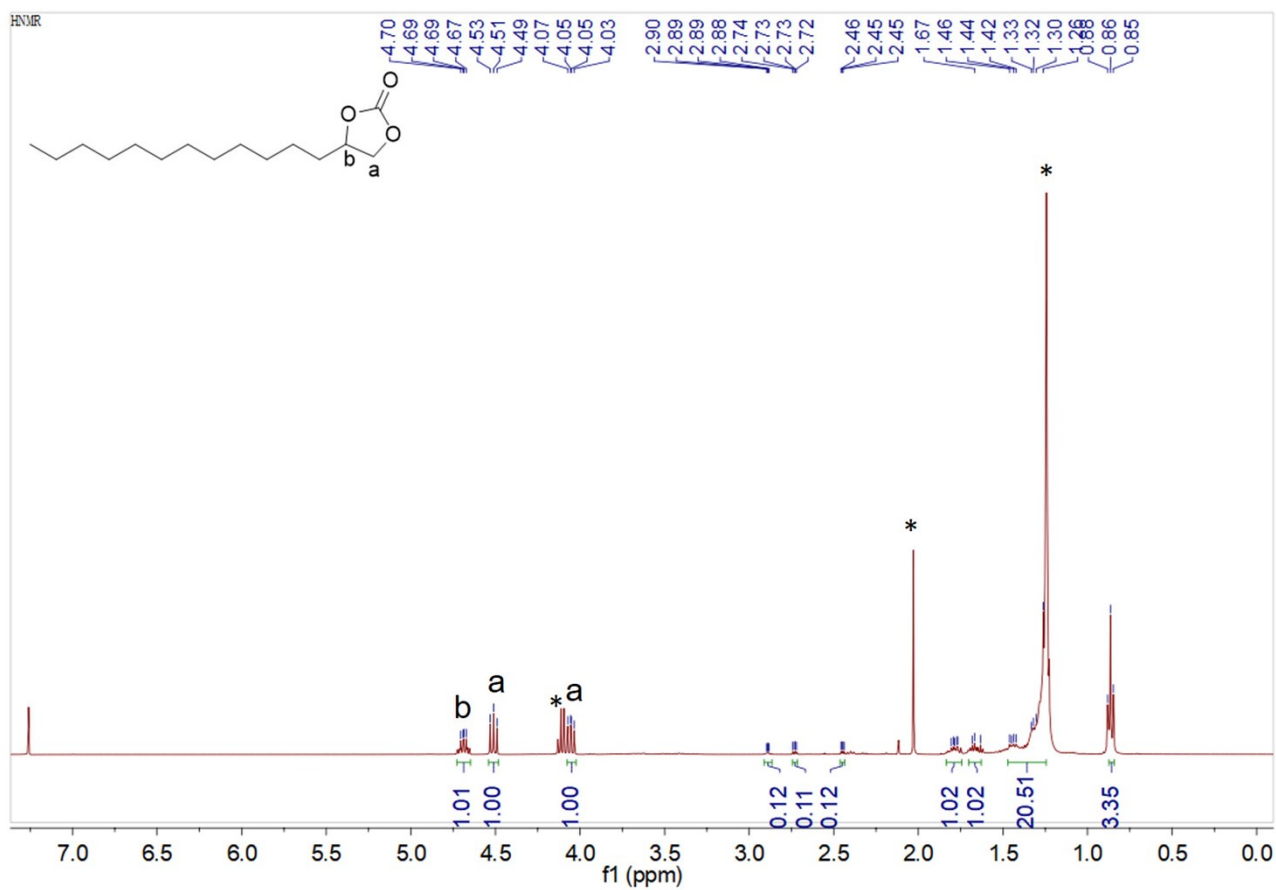

**Fig. S17**  $^1\text{H}$  NMR spectrum of 4-dodecyl-1,3-dioxolan-2-one (400 MHz,  $\text{CDCl}_3$ ):  $\delta$  4.69 (1H,  $\text{CH}_2$ ), 4.54~4.48 (1H,  $\text{CH}_2$ ), 4.05 (1H,  $\text{CH}_2$ ), 1.83~1.74 (2H,  $\text{CH}_2$ ), 1.24 (20H,  $\text{CH}_2$ ), and 0.86 ppm (3H,  $\text{CH}_3$ ).

## References

- (S1) Y. Xie, T.-T. Wang, R.-X. Yang, N.-Y. Huang, K. Zou and W.-Q. Deng, *ChemSusChem*, 2014, **7**, 2110-2114.
- (S2) Y. Xie, R.-X. Yang, N.-Y. Huang, H.-J. Luo and W.-Q. Deng, *J. Energy Chem.*, 2014, **23**, 22-28.
- (S3) J. Chen, H. Li, M. Zhong and Q. Yang, *Green Chem.*, 2016, **18**, 6493-6500.
- (S4) Z. Dai, Q. Sun, X. Liu, L. Guo, J. Li, S. Pan, C. Bian, X. Hu, X. Meng, L. Zhao, F. Deng and F.-S. Xiao, *ChemSusChem*, 2017, **10**, 1186-1192.
- (S5) Z. Dai, Q. Sun, X. Liu, C. Bian, Q. Wu, S. Pan, L. Wang, X. Meng, F. Deng and F.-S. Xiao, *J. Catal.*, 2016, **338**, 202-209.
- (S6) H. Li, C. Li, J. Chen, L. Liu and Q. Yang, *Chem. Asian J.*, 2017, **12**, 1095-1103.
- (S7) W. Wang, C. Li, L. Yan, Y. Wang, M. Jiang and Y. Ding, *ACS Catal.*, 2016, **6**, 6091-6100.
- (S8) J. Liu, G. Zhao, O. Cheung, L. Jia, Z. Sun and S. Zhang, *Chem. Eur. J.*, 2019, **25**, 9052-9059.
- (S9) S. Jayakumar, H. Li, L. Tao, C. Li, L. Liu, J. Chen and Q. Yang, *ACS Sustainable Chem. Eng.*, 2018, **6**, 9237-9245.
- (S10) S. Jayakumar, H. Li, J. Chen and Q. Yang, *ACS Appl. Mater. Interfaces*, 2018, **10**, 2546-2555.
- (S11) Y. Chen, R. Luo, Q. Xu, J. Jiang, X. Zhou and H. Ji, *ACS Sustainable Chem. Eng.*, 2018, **6**, 1074-1082.
- (S12) D. Ma, J. Li, K. Liu, B. Li, C. Li and Z. Shi, *Green Chem.*, 2018, **20**, 5285-5291.
- (S13) T.-T. Liu, J. Liang, Y.-B. Huang and R. Cao, *Chem. Commun.*, 2016, **52**, 13288-13291.
